# Supplementary material for: Serological Profile of Children and Young Adults with at Least One SARS-CoV-2 Positive Cohabitant: An Observational Study
Source: PubMed Central journal article supplement (PMC7914765; doi:10.3390/ijerph18041488), 2021-02-04
Supplement: ijerph-18-01488-s001.pdf [file ijerph-18-01488-s001.pdf]

The interviewed subject was the positive cohabitant

Questions about the family cluster:

- 1) How many cohabitants are there in your family?
- 2) How old is the child's father?
- 3) How old is the child's mother?
- 4) How many cohabiting people are between 4 and 16 years old and how old are them?
- 5) How many cohabiting people are under 4 years old and how old are them?
- 6) How many cohabiting people are over 16 years old (without considering parents) and how old are them?
- 7) How many other cohabitants (apart from you) had a positive COVID-19 swab result?
- 8) How many cohabitants had negative COVID-19 swab results?
- 9) How many symptomatic cohabitants who did not receive a swab are there?

Questions about cohabitants who tested positive:

- 1) Which is your gender?
- 2) How old are you?
- 3) On which day were you diagnosed with COVID-19 via positive swab?
- 4) On which day did you have the first symptoms?
- 5) Have you been hospitalized?
- 6) Have you had a negative swab result stating that you are cured?
- 7) What day was the negativization formalized?
- 8) Do you currently have symptoms?

Questions about children:

- 1) How old is the child / young adult?
- 2) Which is the child / young adult's gender?
- 3) Was the child / young adult in contact with non-cohabiting people during the lockdown period (grandparents, babysitters, etc...)?
- 4) Does the child / young adult have chronic diseases?
- 5) If the previous answer was positive, does the child / young adult take any medication for the current diseases?
- 6) What medication has the child / young adult taken in the last 5 months?
- 7) Does the child / young adult currently have symptoms?
